# Supplementary material for: Improved phase purity and film quality in quasi-2D perovskite light-emitting diodes by an additive with the trimethacrylate group
Source: Royal Society of Chemistry journal article supplement (doi:10.1039/d1ra09040b), 2022-01-01
Supplement: d1ra09040b1.pdf [file d1ra09040b1.pdf]

## Improved phase purity and film quality in quasi-2D perovskite light emitting diodes by an additive with trimethacrylate group

Xiaofeng Huang<sup>a,b</sup>, Wu Liu<sup>a,b</sup>, Wei Wang<sup>a,b</sup>, Yao Lu<sup>a,b</sup>, Jie Dong<sup>a,b</sup>, Yueqiao Li<sup>a,b</sup>, Dong Wei<sup>c</sup>, Bo Qiao<sup>a,b</sup>, Suling Zhao<sup>a,b</sup>, Zheng Xu<sup>a,b</sup>, Dandan Song<sup>\*a,b</sup>

<sup>a</sup> Key Laboratory of Luminescence and Optical Information, Beijing Jiaotong University, Ministry of Education, Beijing 100044, China

<sup>b</sup> Institute of Optoelectronics Technology, Beijing Jiaotong University, Beijing 100044, China

<sup>c</sup> College of Physics and Energy, Fujian Normal University, Fuzhou, 350117, China

\*Corresponding author: [ddsong@bjtu.edu.cn](mailto:ddsong@bjtu.edu.cn)

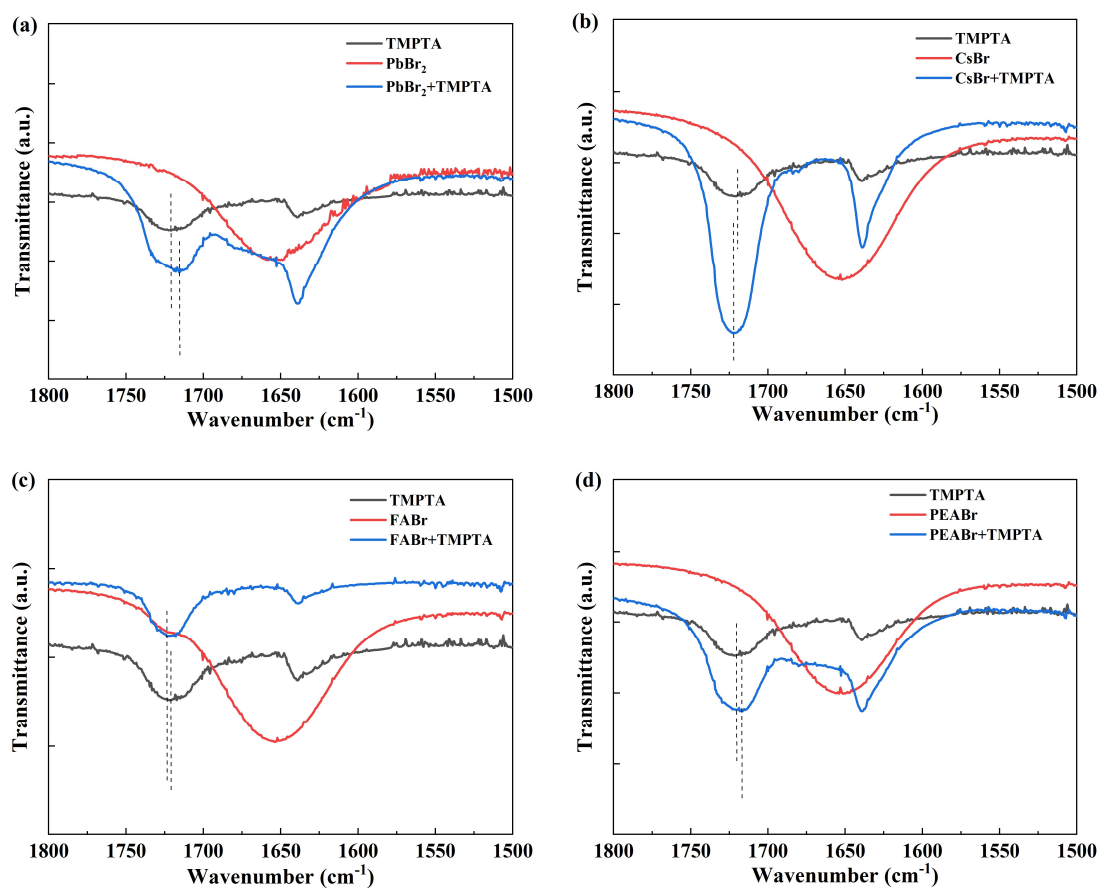

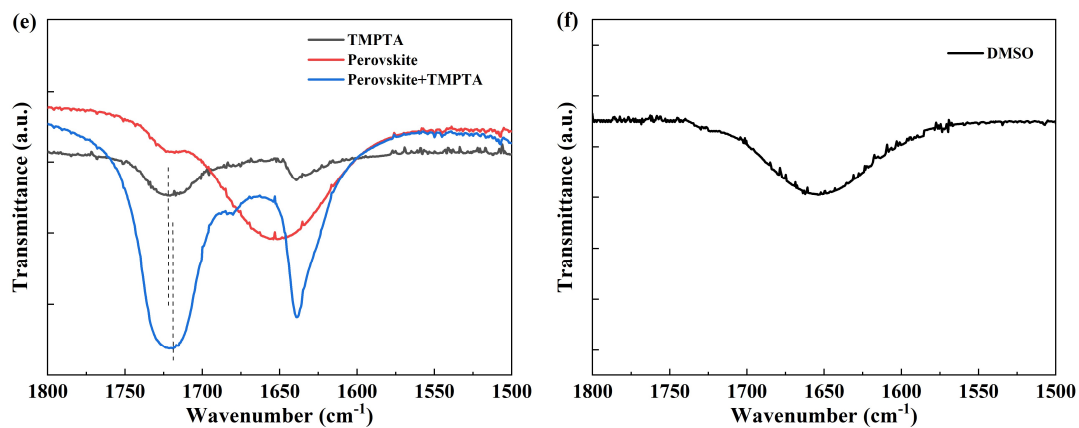

Fig. S1 (a-f) FTIR spectra from different pure substances and their mixed solutions in DMSO solvent.

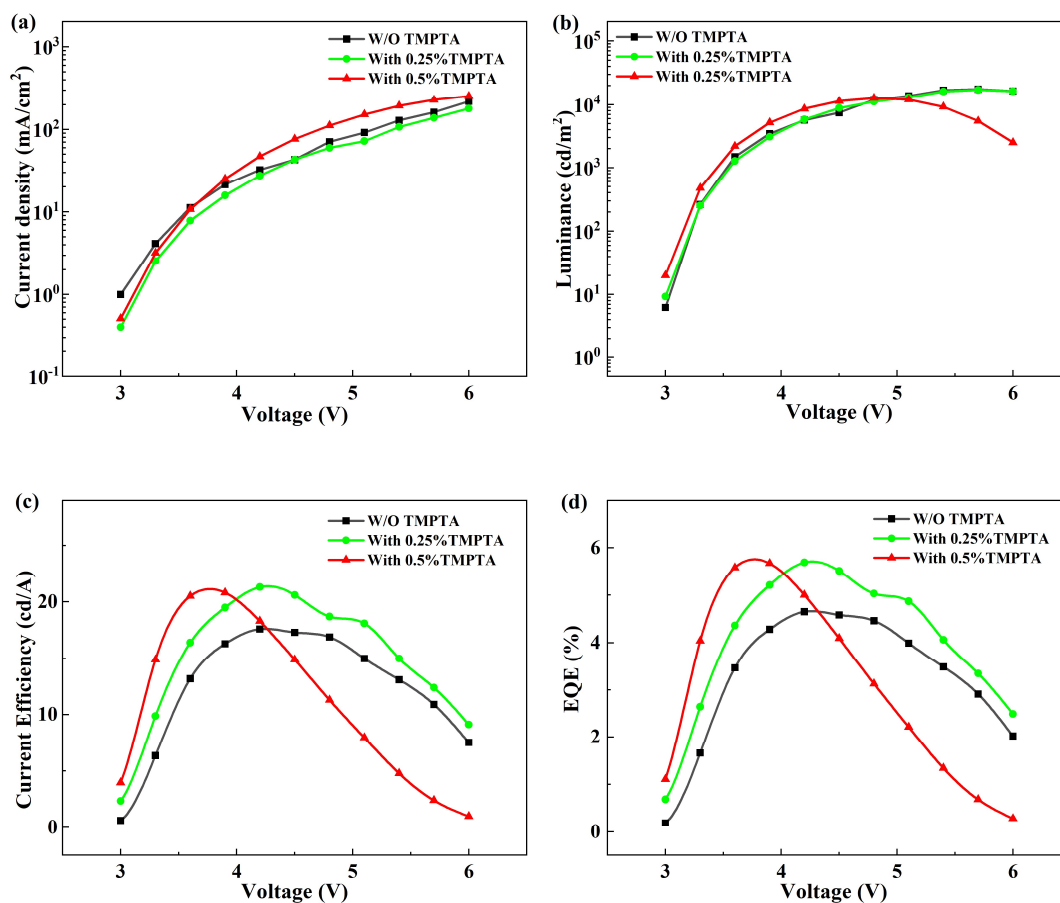

Fig.S2 Current density-voltage-luminance curves, current efficiency and external quantum efficiency versus current density (CE-J and EQE-J) curves of the PeLEDs using CB as the anti-solvent. The ratio of TMPTA is its concentration in CB anti-solvent.

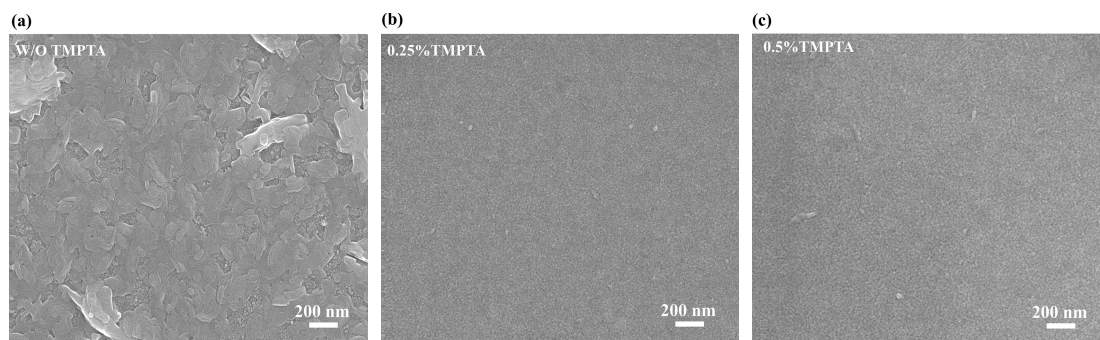

**Fig.S3** (a-c) SEM images of the perovskite films fabricated using CB as the anti-solvent and with different contents of TMPTA in CB.

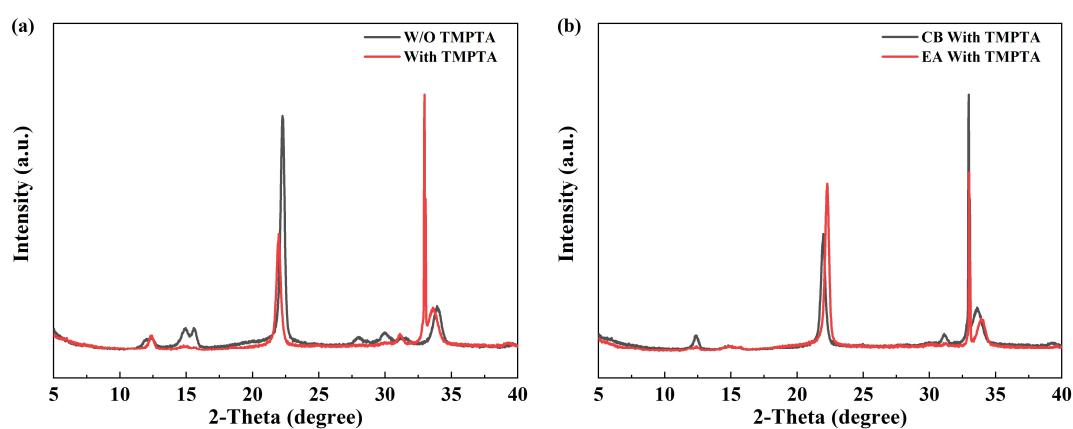

**Fig.S4** (a) XRD patterns of the perovskite films fabricated with and without TMPTA in chlorobenzene. (b) Comparison of the XRD patterns of the perovskite films with TMPTA added in different anti-solvents.

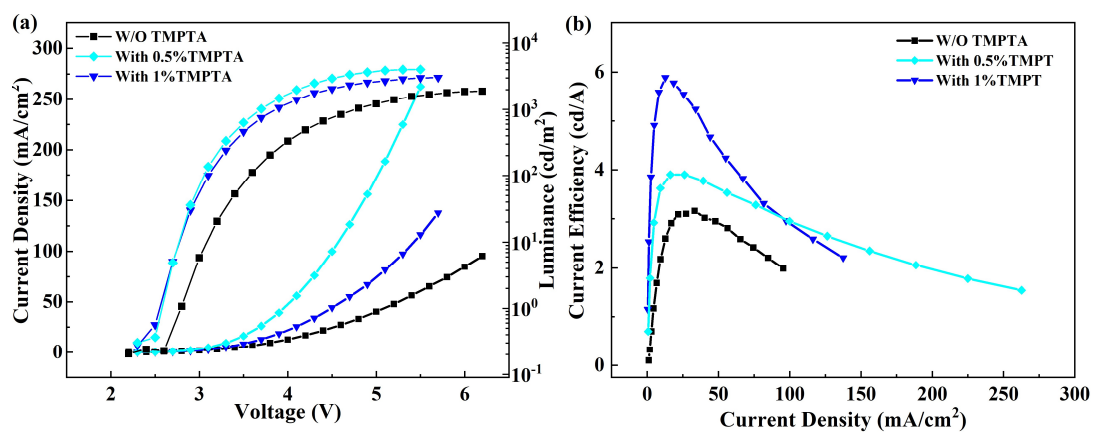

**Fig.S5** (a) Current density-voltage-luminance (J-V-L) curves, (b) current efficiency-current density (CE-J) curves of the PeLEDs with CsPbBr<sub>3</sub> as the emission layer. The ratio of TMPTA is its concentration in precursor solution.

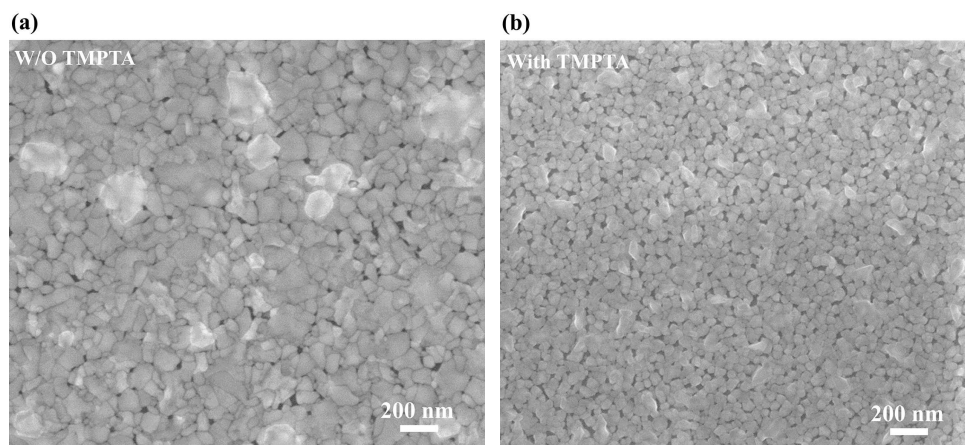

**Fig.S6** Top-view SEM images of the CsPbBr<sub>3</sub> perovskite films without or with TMPTA modification.
